# Supplementary material for: In Vitro and In Vivo Biocompatibility of Natural and Synthetic Pseudomonas aeruginosa Pyomelanin for Potential Biomedical Applications
Source: MDPI journal article supplement (doi:10.3390/ijms24097846), 2023-04-25
Supplement: s1 [file s1]

# In Vitro and In Vivo Biocompatibility of Natural and Synthetic *Pseudomonas aeruginosa* Pyomelanin for Potential Biomedical Applications

Mateusz M. Urbaniak <sup>1,2</sup>, Małgorzata Gazińska <sup>3</sup>, Karolina Rudnicka <sup>1</sup>, Przemysław Płociński <sup>1</sup>, Monika Nowak <sup>1</sup> and Magdalena Chmiela <sup>1,\*</sup>

<sup>1</sup> Department of Immunology and Infectious Biology, Faculty of Biology and Environmental Protection, University of Łódź, 90-237 Łódź, Poland

<sup>2</sup> The Bio-Med-Chem Doctoral School, University of Lodz and Lodz Institutes of the Polish Academy of Sciences, 90-237 Łódź, Poland

<sup>3</sup> Department of Engineering and Technology of Polymers, Faculty of Chemistry, Wrocław University of Science and Technology (WUST), 50-370 Wrocław, Poland

**SUPPLEMENTARY MATERIAL**

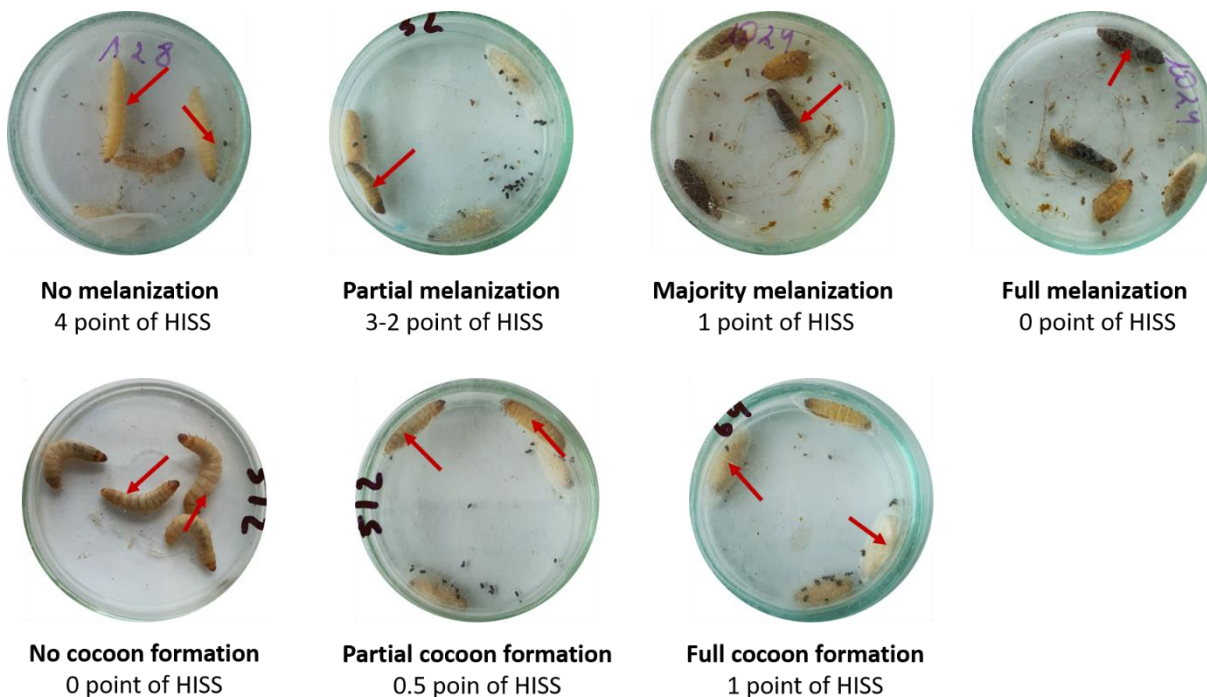

**Supplementary Figure S1.** Larval morphological changes observed in melanization and cocoon formation during Health Index Scoring System (HISS) assessment.

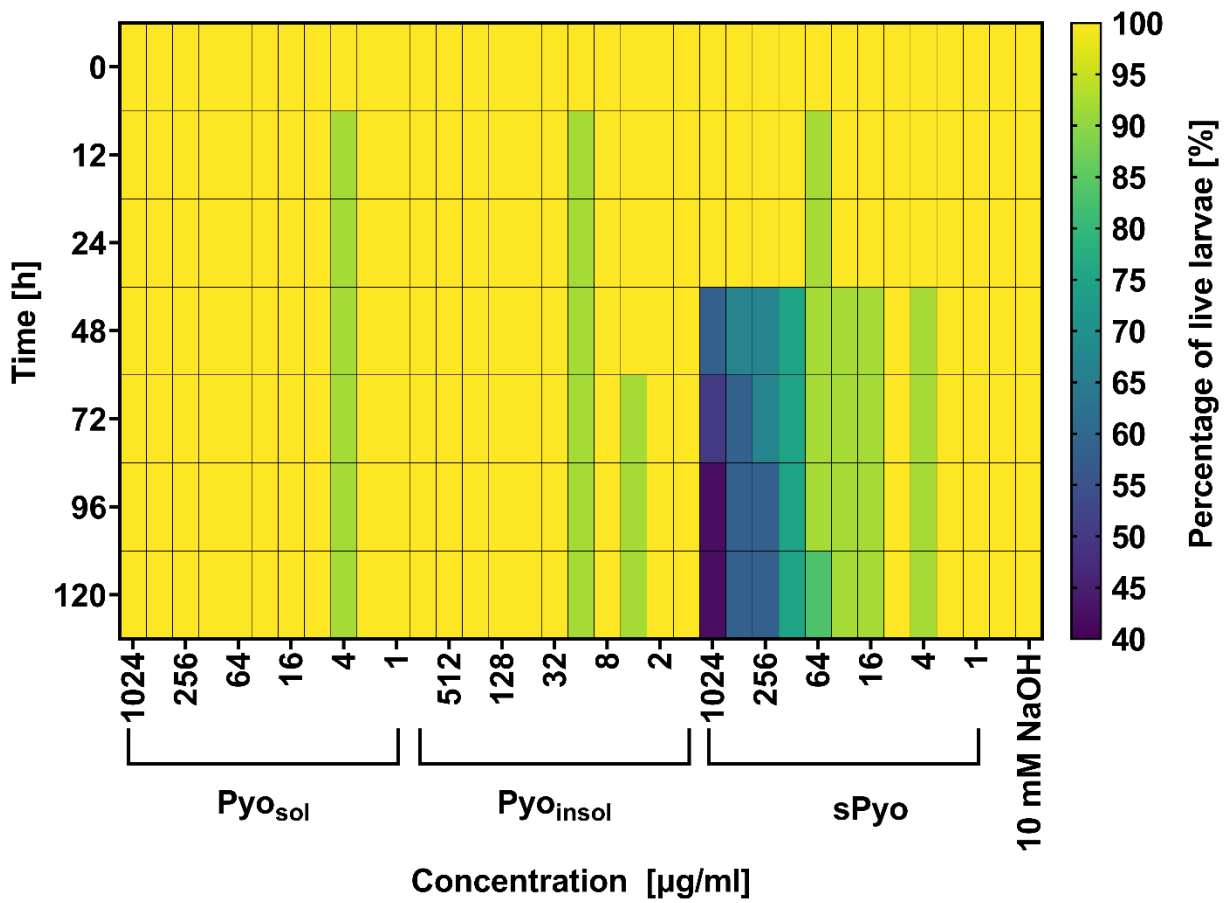

**Supplementary Figure S2.** Heatmap of toxicity for *G. mellonella* at 0, 12, 24, 48, 72, 96, and 120 hrs from the injection of water-soluble ( $\text{Pyo}_{\text{sol}}$ ), water-insoluble ( $\text{Pyo}_{\text{insol}}$ ), and synthetic (sPyo) pyomelanin in the concentration range 1-1024 µg/mL and control substances: phosphate buffer (PBS) and 50 mM NaOH.
